# Supplementary material for: Life as a bachelor: quantifying the success of an alternative reproductive tactic in male blue monkeys
Source: PeerJ. 2015 Jun 23;3:e1043. doi: 10.7717/peerj.1043 (PMC4485239; doi:10.7717/peerj.1043)
Supplement: Data S1 — Data set used to identify predictors of extra-group male and bachelor male siring success. [file peerj-03-1043-s001.xlsx]

## Sheet: Offspring-Male Data Set Elo.txt
Kid	Male	Status	Time_in_Group	Elo_Rank	Sire
Feli	Putn	R	1	1234	0
Feli	KL	B	1	677	1
Feli	Osca	B	1	1103	0
Feli	Smil	B	0.6	1053	0
Bans	Putn	R	1	1247	1
Bans	KL	B	0.9375	636	0
Bans	Osca	B	0.9375	1034	0
Bans	Smil	B	0.9375	1192	0
Rave	Putn	R	0.857143	1231	0
Rave	KL	B	1	606	0
Rave	Osca	B	0.857143	1023	1
Rave	Smil	B	1	1233	0
Ardm	Putn	R	0.909091	1344	0
Ardm	KL	B	0.818182	597	0
Ardm	Osca	B	0.909091	966	0
Ardm	Smil	B	1	1215	1
Alli	Putn	R	1	1519	1
Alli	KL	B	0.916667	661	0
Alli	Osca	B	1	1071	0
Alli	Smil	B	0.5	1195	0
Park	Putn	R	0.888889	1542	1
Park	KL	B	0.888889	646	0
Park	Osca	B	0.888889	1075	0
Park	Smil	B	1	1089	0
Sava	Putn	R	0.952381	1470	1
Sava	Ghos	B	0.047619	975	0
Sava	KL	B	0.47619	697	0
Sava	Osca	B	1	888	0
Sava	Rock	B	0.047619	955	0
Sava	Smil	B	0.952381	1328	0
Kati	Putn	R	1	1428	0
Kati	Osca	B	1	888	0
Kati	Smil	B	1	1369	1
Quil	Putn	R	1	1501	1
Quil	KL	B	0.5	697	0
Quil	Osca	B	0.5	888	0
Quil	Smil	B	1	1297	0
Twis	PH	R	1	1270	1
Prez	PH	R	1	1301	1
Pili	PH	R	1	1301	1
Mini	PH	R	1	1308	1
Ambo	Putn	R	1	1514	1
Ambo	Kent	B	1	724	0
Ambo	KL	B	0.6	716	0
Ambo	Osca	B	1	954	0
Ambo	Rock	B	0.8	924	0
Ambo	Smil	B	1	1229	0
Trix	Putn	R	0.909091	1514	0
Trix	PH	N	0.0909091	1308	0
Trix	Kent	B	0.636364	724	0
Trix	KL	B	0.363636	716	0
Trix	Osca	B	1	954	0
Trix	Rock	B	0.818182	924	0
Trix	Smil	B	1	1229	1
Dude	PH	R	1	1308	1
Razo	PH	R	1	1308	1
Spee	PH	R	1	1308	1
Dada	PH	R	1	1308	1
Dion	PH	R	1	1370	1
Bost	Rock	R	1	1429	0
Bost	Davy	B	0.833333	912	0
Bost	KL	B	0.833333	816	0
Bost	Mwiz	B	0.5	1000	0
Bost	Osca	B	1	745	0
Bost	Smil	B	1	983	0
Agro	Ghos	R	1	968	1
Agro	Milo	N	0.166667	1000	0
Cide	Ghos	R	1	1018	0
Bens	Rock	R	1	1431	0
Bens	PH	N	0.571429	1332	1
Bens	Davy	B	1	912	0
Bens	KL	B	1	719	0
Bens	Mwiz	B	0.428571	1033	0
Bens	Osca	B	0.857143	796	0
Bens	Smil	B	1	1174	0
Bink	Rock	R	1	1441	0
Bink	Davy	B	1	912	0
Bink	Osca	B	1	706	0
Bink	Smil	B	1	1110	0
Sifa	Rock	R	0.954545	1477	0
Sifa	PH	N	0.0454545	1403	1
Sifa	Davy	B	0.909091	905	0
Sifa	Kent	B	0.0909091	634	0
Sifa	KL	B	0.954545	752	0
Sifa	Mwiz	B	0.181818	1108	0
Sifa	Osca	B	0.954545	691	0
Sifa	Smil	B	1	1037	0
Sifa	Wats	B	0.0454545	1000	0
Buzz	Ghos	R	1	1035	1
Kool	Rock	R	1	1533	0
Kool	PH	N	0.25	1403	0
Kool	Davy	B	1	905	0
Kool	Kent	B	0.5	625	0
Kool	KL	B	1	712	0
Kool	Lavar	B	0.25	1097	0
Kool	Osca	B	0.75	831	0
Kool	Smil	B	0.5	1030	0
Gumm	Rock	R	1	1596	0
Gumm	PH	N	0.333333	1268	1
Gumm	Davy	B	0.666667	905	0
Gumm	KL	B	1	701	0
Gumm	Mwiz	B	0.666667	1033	0
Gumm	Osca	B	1	814	0
Gumm	Smil	B	1	1001	0
Bond	Ghos	R	1	1120	1
Saph	Putn	R	1	1600	1
Tann	PH	R	1	1268	1
Layl	Ghos	R	1	977	1
Pari	PH	R	1	1268	0
Aman	Ghos	R	1	977	1
Rein	PH	R	0.909091	1181	1
Drag	PH	R	1	1181	1
Drag	Ace	B	0.5	1000	0
Mali	PH	R	1	1181	1
Sema	Rock	R	1	1495	0
Sema	Mwiz	B	1	1049	1
Dixi_08_inf	Rock	R	0.818182	1503	0
Dixi_08_inf	PH	N	0.181818	1207	1
Dixi_08_inf	Davy	B	0.818182	847	0
Dixi_08_inf	KL	B	0.636364	1099	0
Dixi_08_inf	Mwiz	B	0.727273	951	0
Dixi_08_inf	Wats	B	0.181818	916	0
Chao	Ghos	R	1	1243	1
Kwan	Rock	R	1	1524	0
Kwan	Davy	B	0.25	914	1
Kwan	Mwiz	B	0.5	951	0
Shim	PH	R	1	1207	0
Siku	PH	R	1	1283	1
Taxi	PH	R	1	1283	1
Agad	Milo	R	1	1134	1
Agad	Spur	B	1	880	0
Brog	Rock	R	1	1420	0
Brog	Osca	B	0.333333	842	0
Brog	Smil	B	0.333333	931	0
Tusk	PH	R	1	1283	1
Tusk	Davy	B	0.25	859	0
Kril	Sur	R	1	1122	1
Jasm	Milo	R	1	1161	1
Jasm	Spur	B	1	880	0
Brit	Milo	R	1	1182	0
Brit	Pick	B	1	1000	1
Dust	Sur	R	1	1149	1
Boma	Rock	R	1	1358	0
Boma	PH	N	0.2	1352	1
Boma	KL	B	0.4	834	0
Boma	Osca	B	0.2	916	0
Tart	Rock	R	1	1407	0
Tart	PH	N	0.333333	1303	1
Stre	PH	R	1	1268	1
Burn	Rock	R	1	1445	0
Burn	KL	B	1	834	0
Dubl	Rock	R	1	1445	0
Dubl	KL	B	0.333333	834	0
Fris	Rock	R	1	1445	0
Fris	KL	B	1	834	0
Bike	Rock	R	1	1445	0
Gilb	Milo	R	1	1182	1
Shar	Milo	R	1	1182	1
Ropa	PH	R	1	1268	1
Cycl	Sawa	R	1	1068	0
Fish	Sawa	R	1	1068	0
Mend	PH	R	1	1172	1
Keny	Sur	R	1	1067	1
Dean	PH	R	1	1172	1
Ting	PH	R	1	1172	1
Ruki	Quac	R	1	997	1
Poe_11_inf	Percy	R	1	950	1
Suda	Marv	R	1	1167	1
Suda	Mwiz	B	0.1	876	0
Bill_11_inf	Marv	R	1	1167	1
Goph	Percy	R	1	1025	0
Lox	Sawa	R	0.333333	1064	1
Cind	Sawa	R	1	1064	1
Jive	Sawa	R	1	1064	1
Sava_11b_inf	Marv	R	1	1214	1
Sava_11b_inf	Mwiz	B	1	876	0
Flor	Percy	R	1	1025	1
Dame	Marv	R	1	1181	1
Dame	KL	B	0.6	766	0
Dame	Mwiz	B	0.6	815	0
Bill_12_inf	Marv	R	1	1189	1
